# Supplementary material for: Direct synthesis of propylene glycol methyl ether from propylene using an Al-TS-1 catalyst: Ti–Al synergy
Source: Royal Society of Chemistry journal article supplement (doi:10.1039/d3nj00194f), 2023-01-01
Supplement: d3nj00194f1.pdf [file d3nj00194f1.pdf]

## Supporting Information

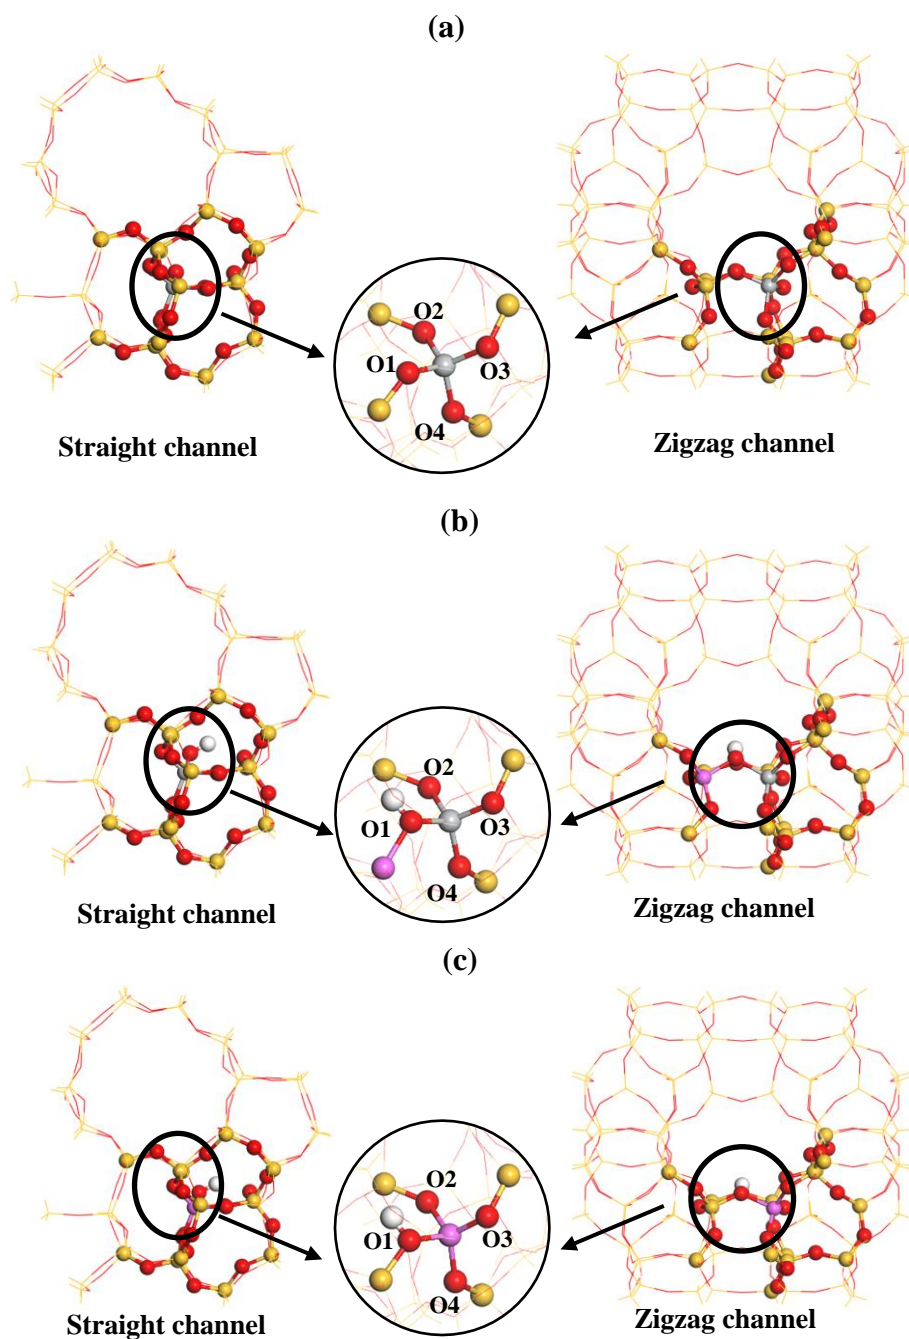

**Figure S1.** Optimized structure of the Ti sites models calculated at the QM/MM method. (a) TS-1, (b) Al-TS-1 and (c) ZSM-5. View along the straight channel and zigzag channel. (Ti = lightgray, Si = green, O = red, Al=pink, and H = white).

---
